# Supplementary material for: Down-regulation of long non-coding RNA HOTAIR sensitizes breast cancer to trastuzumab
Source: PubMed Central journal article supplement (PMC6934784; doi:10.1038/s41598-019-53699-w), 2019-12-27
Supplement: 41598_2019_53699_MOESM1_ESM.pdf [file 41598_2019_53699_MOESM1_ESM.pdf]

## Supplementary Information

**Title: Down-regulation of long non-coding RNA HOTAIR sensitizes breast cancer to trastuzumab**

**Title: List of authors:** Tianwen Chen<sup>1,\$</sup>, Zeming Liu<sup>2,\$</sup>, Wen Zeng<sup>3</sup>, Tao Huang<sup>2,\*</sup>

<sup>1</sup>Department of Breast and Thyroid Surgery, Nanshan Hospital affiliated to Shenzhen University, Shenzhen, China

<sup>2</sup>Department of Breast and Thyroid Surgery, Union Hospital, Tongji Medical College, Huazhong University of Science and Technology, Wuhan, China

<sup>3</sup>Department of Ophthalmology, Zhongnan Hospital, Wuhan University, Wuhan, Hubei, China

## SUPPLEMENTARY FIGURE LEGENDS

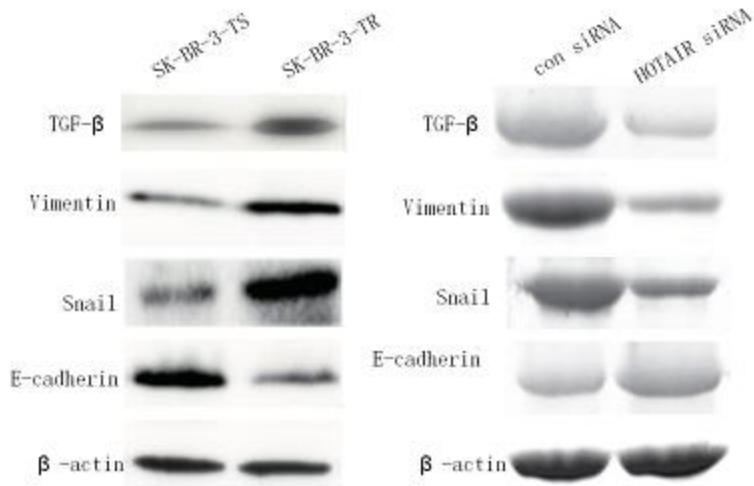

**Supplementary Figure 5:** Protein blots of of the ETM-related genes following SHOTAIR knockdown. Western blotting was performed according to standard protocols (Biorad Turboblot System). Primary antibodies were detected using goat anti-rabbit or goat anti-mouse horseradish peroxidase (HRP)-conjugated secondary antibodies (Santa Cruz Biotechnology, US A). Immunoreactive bands were visualized using Western Lighting Chemiluminescence Reagent Plus (PerkinElmer, USA).

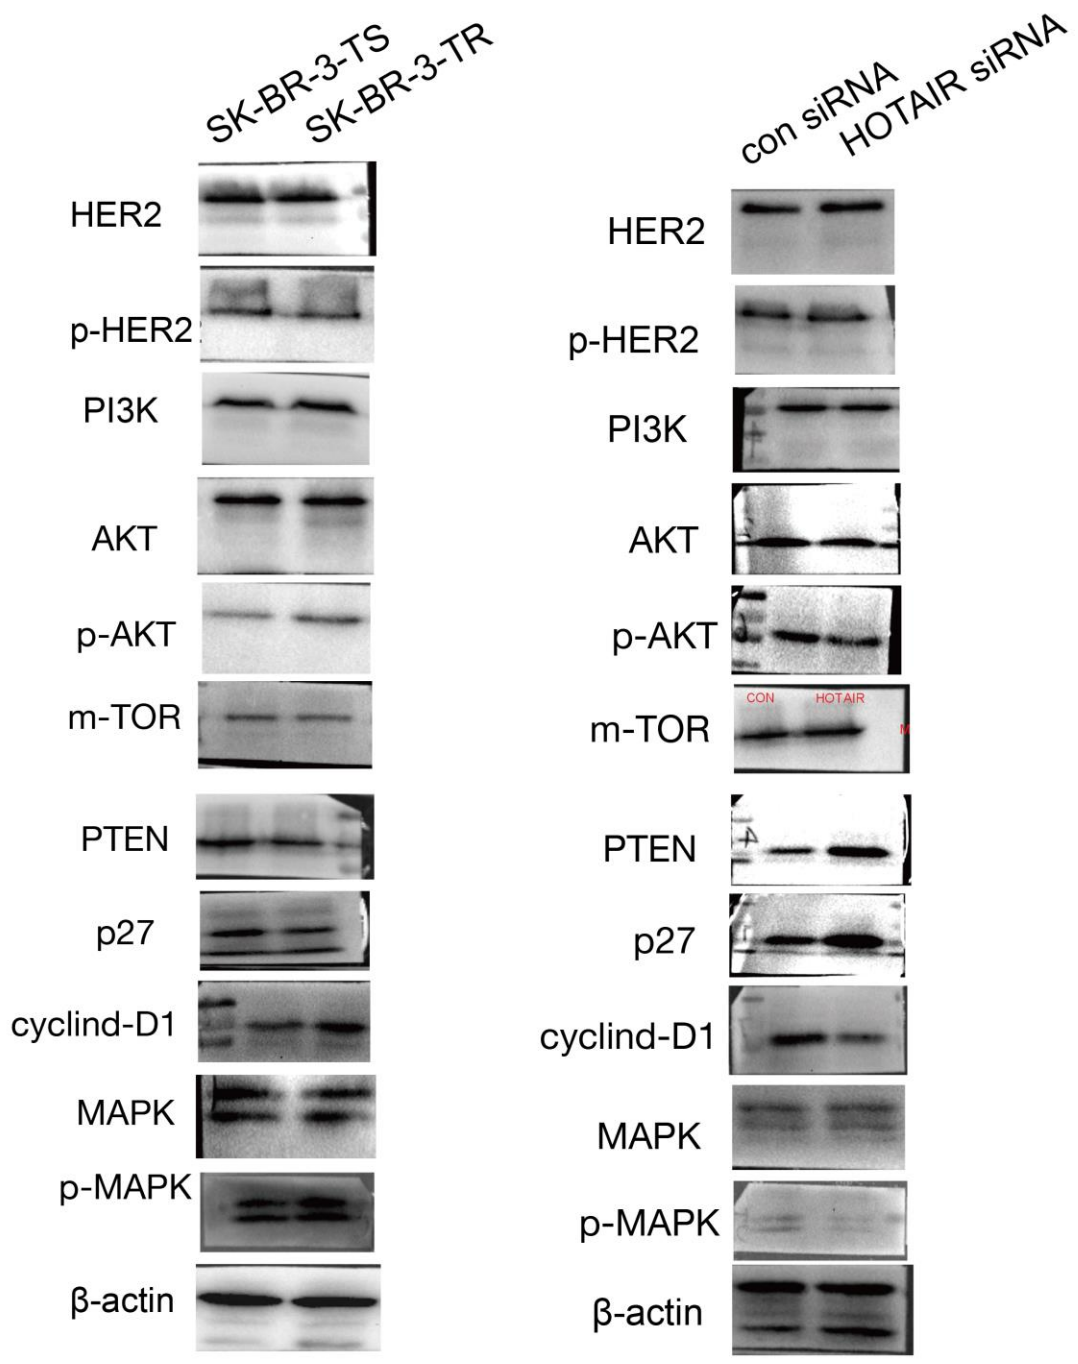

**Supplementary Figure 7:** Protein levels of genes in the PI3K/AKT/mTOR, MEK/MAPK and HER2 receptor pathways following SHOTAIR knockdown. Western blotting was performed according to standard protocols (Biorad Turboblot System). Primary antibodies were detected using goat anti-rabbit or goat anti-mouse horseradish peroxidase (HRP)-conjugated secondary antibodies (Santa Cruz Biotechnology, US A). Immunoreactive bands were visualized using Western Lighting Chemiluminescence Reagent Plus (PerkinElmer, USA).
